# Supplementary material for: Prediction of neoplastic gallbladder polyps in patients with different age level based on preoperative ultrasound: a multi-center retrospective real-world study
Source: Research Square preprint supplement (doi:10.21203/rs.3.rs-2435645/v1), 2023-01-06
Supplement: Supplementary file 1 [file d6d626821ff1a9c27b6e33b4.docx]

**Table 1**. Comparison of preoperative clinical data of gallbladder polyps in different age groups

|  | Different groups (n=1523) | | | ***Z/χ2*** | *P* |
| --- | --- | --- | --- | --- | --- |
| Young adults group (n=622) | Middle-aged group (n=665) | Elderly group  (n=236) |
| Sex |  |  |  |  |  |
| Male | 269 (43.2) | 219 (32.9) | 94 (39.8) | 14.793 | 0.001 |
| Female | 353 (56.8) | 446 (67.1) | 142 (60.2) |
| Polyp detection time |  |  |  |  |  |
| <1y | 244 (39.2) | 307 (46.2) | 101 (42.8) | 9.656 | 0.140 |
| 1-3y | 204 (32.8) | 178 (26.8) | 72 (30.5) |
| 3-5y | 75 (12.1) | 86 (12.9) | 24 (10.2) |
| >5y | 99 (15.9) | 94 (14.1) | 39 (16.5) |
| Combined with digestive system symptoms | | | | | |
| No | 411 (66.1) | 424 (63.8) | 147 (62.3) | 2.295 | 0.891 |
| abdominal pain | 121 (19.5) | 145 (21.8) | 55 (23.3) |
| bloating and(or) diarrhea | 67 (10.8) | 68 (10.2) | 25 (10.6) |
| dyspepsia | 23 (3.7) | 29 (4.2) | 9 (3.8) |
| AST (U/L) | 25.0 (10.0~60.0) | 22.0 (10.0~60.0) | 24.5 (10.0~247.0) | 4.313 | 0.016 |
| ALT (U/L) | 31.0 (8.0~89.0) | 27.0 (7.0~83.0) | 30.0 (8.0~219.0) | 2.513 | 0.285 |
| GGT (U/L) | 22.0 (1.0~177.0) | 21.0 (0.0~174.0) | 18.5 (0.0~245.0) | 0.856 | 0.652 |
| TB (μmmol/L) | 10.8 (2.5~37.0) | 12.3 (4.2~43.0) | 11.4 (4.8~44.6) | 2.091 | 0.351 |
| CEA (ng/mL) | 1.9 (0.0~18.6) | 2.2 (0.0~9.3) | 2.7 (0.3~8.6) | 15.862 | <0.001 |
| CA19-9 (U/mL) | 19.0 (0.6~52.6) | 20.0 (0.6~125.6) | 22.0 (0.1~354.0) | 2.129 | 0.345 |
| CA-125 (U/mL) | 20.0 (1.18~63.30) | 16.0 (2.5~44.0) | 14.6 (1.0~145.0) | 15.181 | 0.001 |
| **Preoperative ultrasound feature** | | | | | |
| Number of polyps |  |  |  |  |  |
| Multiple | 402 (64.6) | 421 (63.3) | 122 (51.7) | 12.952 | 0.002 |
| Single | 220 (35.4) | 244 (36.7) | 444 (48.3) |
| Polyp size (long diameter) | 9 (6.0~20.0) | 9 (6.0~20.0) | 9 (6.0~20.0) | 12.181 | 0.002 |
| Polyp size (short diameter) | 7 (2.0~17.0) | 6.0 (2.0~18.0) | 6.8 (3.0~15.0) | 6.480 | 0.039 |
| Polyp site |  |  |  |  |  |
| Neck | 34 (5.5) | 47 (7.1) | 15 (6.4) | 7.403 | 0.116 |
| Body | 442 (71.1) | 470 (70.7) | 150 (63.6) |
| Bottom | 146 (23.5) | 148 (22.3) | 71 (30.1) |
| Fundus |  |  |  |  |  |
| Pedicle | 517 (83.1) | 531 (79.8) | 177 (75.0) | 7.421 | 0.024 |
| Broad base | 105 (16.9) | 134 (20.2) | 59 (25.0) |
| Thickness of gallbladder wall |  |  |  |  |  |
| <4 mm | 468 (75.2) | 445 (66.9) | 164 (69.5) | 10.955 | 0.004 |
| ≥4 mm | 154 (24.8) | 220 (33.1) | 72 (30.5) |
| Polyp shape |  |  |  |  |  |
| Papillary | 361 (58.0) | 374 (56.2) | 147 (62.3) | 2.737 | 0.603 |
| Nodular | 151 (24.30) | 165 (24.8) | 52 (22.0) |
| Spherical and mulberry | 110 (17.7) | 126 (18.9) | 37 (15.7) |
| Echogenicity |  |  |  |  |  |
| Low | 35 (5.6) | 28 (4.2) | 15 (6.4) | 14.394 | 0.006 |
| Medium | 305 (49.0) | 388 (58.3) | 137 (58.1) |
| Strong | 282 (45.3) | 249 (37.4) | 84 (35.6) |
