# Supplementary material for: Prediction of neoplastic gallbladder polyps in patients with different age level based on preoperative ultrasound: a multi-center retrospective real-world study
Source: Research Square preprint supplement (doi:10.21203/rs.3.rs-2435645/v1), 2023-01-06
Supplement: Supplementary file 2 [file e171d4ab78e9dc87c3ea24be.docx]

Table 4. Comparison of the predictive ability of different models to predict neoplastic polyps

| Groups | Different prediction models | ROC | | | |  | Delong test | |  | Hosmer-Lemeshow goodness of fit | |
| --- | --- | --- | --- | --- | --- | --- | --- | --- | --- | --- | --- |
| AUC (95%CI) | Sensitivity (%) | Specificity (%) | *P* | Z value | *P* | ***χ2*** | *P* |
| Young adults group  (n=622) | Polyp size (long diameter) | 0.712(0.624~0.800) | 62.2 | 75.2 | < 0.001 |  | 2.062 | < 0.05 |  | 9.798 | 0.133 |
| Polyp size (short diameter) | 0.654 (0.562~0.746) | 51.1 | 79.5 | 0.001 |  | 2.856 | < 0.01 |  | 13.576 | < 0.05 |
| Linear scoring model | **0.794 (0.734~0.853)** | **60.0** | **83.5** | **< 0.001** |  | **Ref** | |  | **4.440** | **0.221** |
| Middle-age group (n=665) | Polyp size (long diameter) | 0.802 (0.738~0.867) | 70.6 | 80.3 | < 0.001 |  | 2.208 | < 0.05 |  | 10.311 | 0.067 |
| Polyp size (short diameter) | 0.740 (0.657~0.823) | 60.8 | 82.9 | < 0.001 |  | 3.516 | < 0.001 |  | 10.343 | 0.170 |
| Linear scoring model | **0.857 (0.805~0.908)** | **84.3** | **73.3** | **< 0.001** |  | **Ref** | |  | **1.512** | **0.825** |
| Elderly group  (n=236) | Polyp size (long diameter) | 0.714 (0.593~0.835) | 64.3 | 75.5 | < 0.001 |  | 3.037 | < 0.01 |  | 9.974 | 0.126 |
| Polyp size (short diameter) | 0.693 (0.564~0.822) | 60.7 | 80.8 | 0.001 |  | 2.869 | < 0.01 |  | 9.432 | 0.223 |
| Linear scoring model | **0.849 (0.784~0.914)** | **60.7** | **89.4** | **< 0.001** |  | **Ref** | |  | **5.041** | **0.411** |
